# Supplementary material for: Enhanced photoresponse of epitaxially grown ZnO by MoO3 surface functionalization
Source: Royal Society of Chemistry journal article supplement (doi:10.1039/c9cp06667e), 2020-01-01
Supplement: c9cp06667e1.pdf [file c9cp06667e1.pdf]

## **Supplementary Information**

### **Enhanced photoresponse of epitaxially grown ZnO by MoO<sub>3</sub> surface functionalization**

XiangDong Yang <sup>a</sup>, HaiTao Wang <sup>a</sup>, WeiDong Dou <sup>c</sup>, Peng Wang <sup>d</sup>,  
XuXin Yang <sup>a</sup>, XinHua Pan <sup>b</sup>, Bin Lu <sup>\*b</sup>, and HongYing Mao <sup>\*a</sup>

<sup>a</sup> Department of Physics, Hangzhou Normal University, Hangzhou 311121, China

<sup>b</sup> State Key Labtory of Silicon Materials, School of Materials Science and Engineering,  
Zhejiang University, Hangzhou 310027, China

<sup>c</sup> Laboratory of Low-dimensional Carbon Materials, Physics Department, Shaoxing  
University, Shaoxing, 312000, China

<sup>d</sup> Department of Applied Physics, College of Electronic and Information Engineering,  
Shandong University of Science and Technology, Qingdao, 266590, China

\*Correspondence: [phymaohy@hznu.edu.cn](mailto:phymaohy@hznu.edu.cn) (H. Y. Mao) and [binlu@zju.edu.cn](mailto:binlu@zju.edu.cn) (B. Lu);

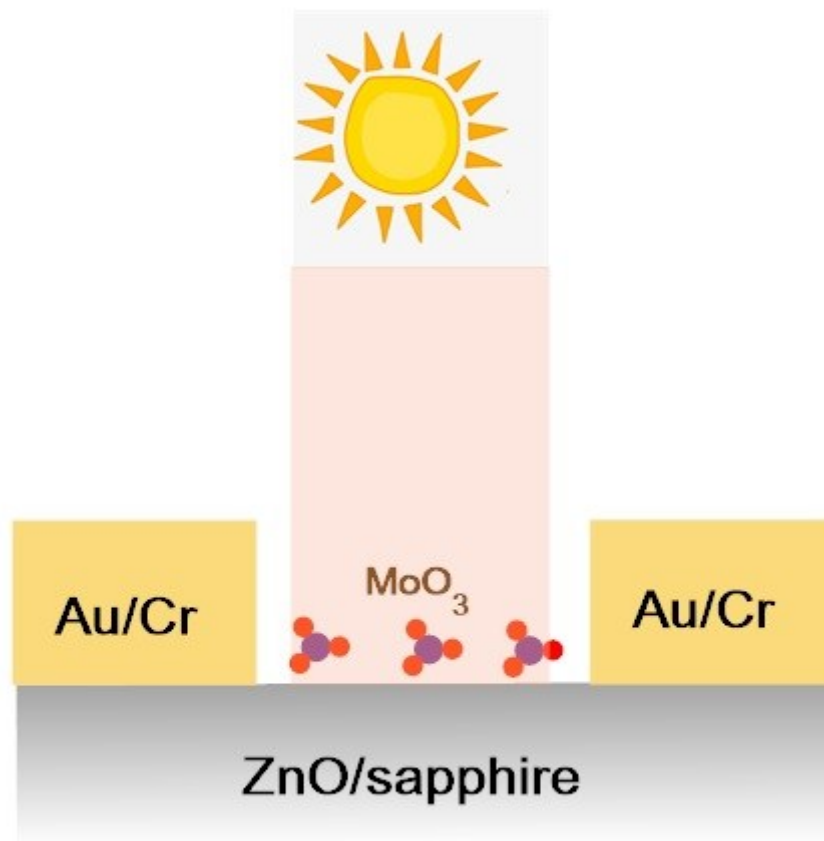

Figure S1 Schematic device structure of MoO<sub>3</sub> modified ZnO

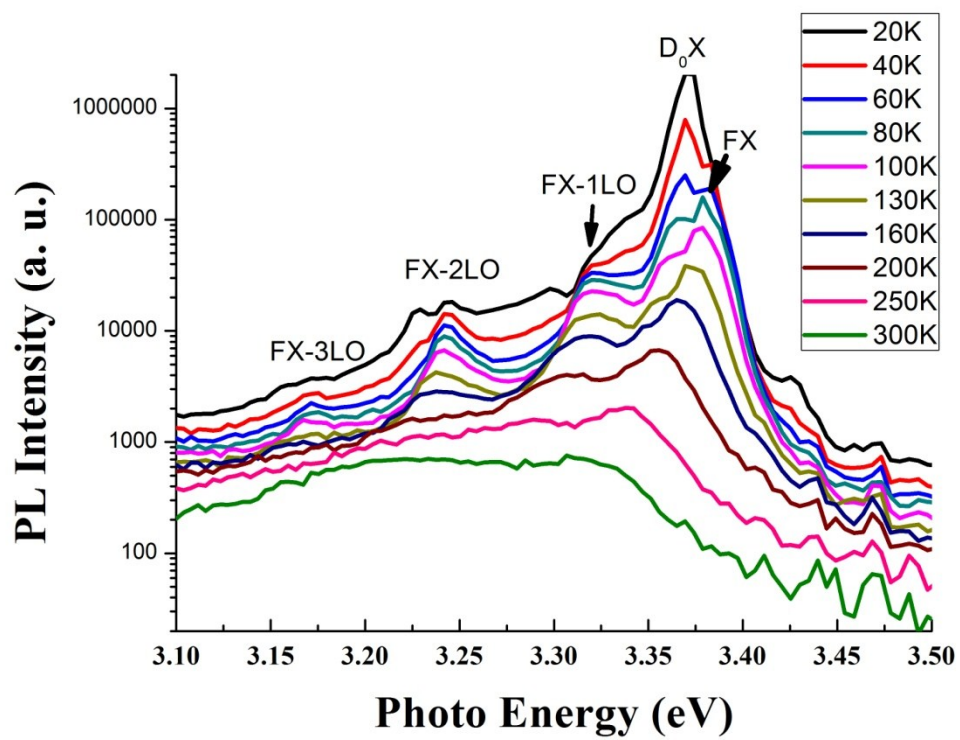

Figure S2 Temperature dependent PL spectra of 0.5 nm modified ZnO

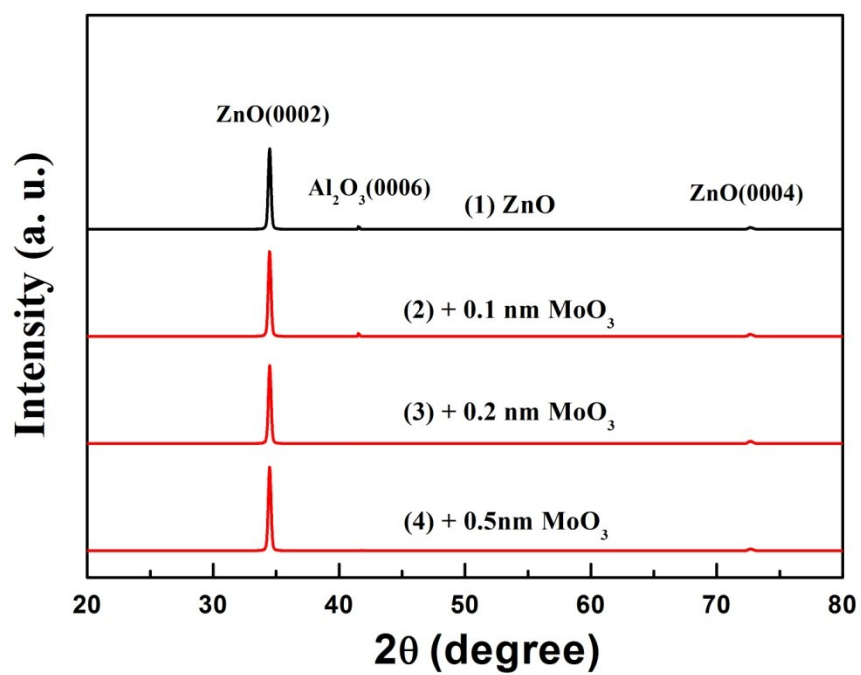

Figure S3 XRD spectra of ZnO thin film before and after the sequential deposition of 0.5 nm MoO<sub>3</sub>.

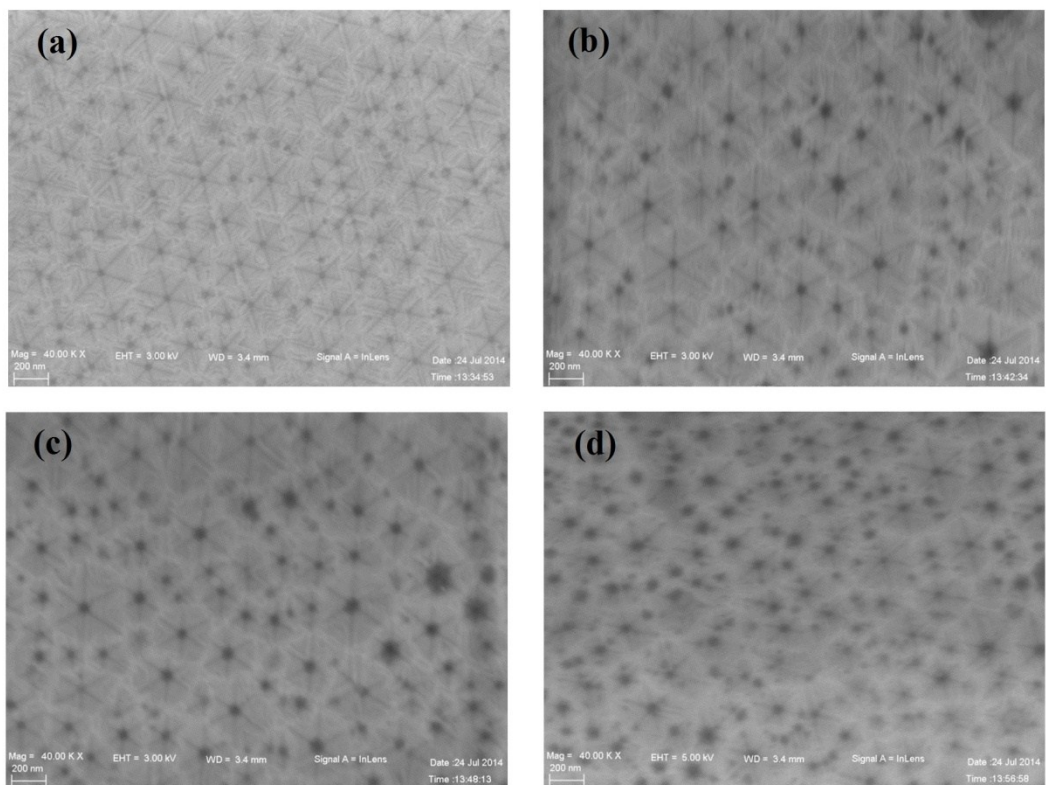

Figure S4 SEM images of (a) pristine ZnO and after (b) 0.1, (c) 0.2, and (d) 0.5 nm  $\text{MoO}_3$  modification.
